# Supplementary material
Source: publisher figshare collection journal article supplement (https://acs.figshare.com/ndownloader/files/3943312)
Supplement: Supplementary file 1 [file 3943312]

## Supplementary Information

### A Fully Integrated Lab-on-a-Disc for Nucleic Acid Analysis of Food-borne Pathogens

Tae-Hyeong Kim<sup>‡</sup>, Juhee Park<sup>‡</sup>, Chi-Ju Kim and Yoon-Kyoung Cho\*

Department of Biomedical Engineering, Ulsan National Institute of Science and Technology (UNIST), UNIST-gil 50, Ulsan, 689-798, Republic of Korea

#### Movie 1. RPA on a disc

The total process of the fully automated RPA on a disc was visualized using color dye solution. The movie was captured using a CCD camera and a strobe light. For better visualization, color dyed solutions were utilized.

#### Computer simulation

COMSOL Multiphysics (COMSOL, USA) software was utilized for simulation study. The heat absorbed on body by laser irradiation can be expressed by

$$Q(x, y, z) = Q_0(1 - R_c) \frac{A_c}{\pi \sigma_x \sigma_y} e^{-\left[\frac{(x-x_0)^2}{2\sigma_x^2} + \frac{(y-y_0)^2}{2\sigma_y^2}\right]} e^{-A_c z}$$

where  $Q_0$  is power input,  $R_c$  is reflection coefficient,  $A_c$  is absorption coefficient,  $\sigma$  is length of each axis in case of ellipse laser beam,<sup>1</sup> however  $\sigma$  is equal to beam diameter in our study because we used a circular beam laser diode for our experiment. We also utilized 808 nm laser diode and irradiated beam diameter on metal plate (10 mm x 10 mm) was 2 mm. Reflection coefficient and absorption coefficient are 0.867 and  $1.13 \times 10^6 \text{ cm}^{-1}$ , respectively. 0.67 W laser irradiation for 300 s was set to provide heat to reach the same temperature with our experimental value for RPA and temperature profiles at this moment were obtained as shown in **Figure 3c,d,e,f**.

#### Reference

1. Yang, S. T.; Matthews, M. J.; Elhadj, S.; Cooke, D.; Guss, G. M.; Draggoo, V. G.; Wegner, P. J., Comparing the use of mid-infrared versus far-infrared lasers for mitigating damage growth on fused silica. *Applied Optics* **2010**, *49*, 2606-2616.

---

<sup>‡</sup> These authors are contributed equally.

\* Corresponding author: Email: ykcho@unist.ac.kr (Y.-K. C); Phone: +82-52-217-2511; Fax: +82-52-217-2509.
